# Supplementary material for: Structural basis for small molecule targeting of Doublecortin Like Kinase 1 DCLK1
Source: Research Square preprint supplement (doi:10.21203/rs.3.rs-133153/v1), 2021-01-15
Supplement: Supplementary file 2 [file 477ac0e89ae89a160f3e80d7.pdf]

## **Supplementary section**

### **Structural basis for small molecule targeting of Doublecortin Like Kinase 1 DCLK1**

Onisha Patel<sup>1,2</sup>, Michael Roy<sup>1,2</sup>, Ashleigh Kropp<sup>1,2</sup>, Weiwen Dai<sup>1,2</sup> and Isabelle Lucet<sup>1,2</sup>

<sup>1</sup>. The Walter and Eliza Hall Institute of Medical Research, Parkville, Victoria 3052, Australia

<sup>2</sup>. Department of Medical Biology, University of Melbourne, Parkville, Victoria, 3052.

\*Correspondence: [lucet.i@wehi.edu.au](mailto:lucet.i@wehi.edu.au), [patel.o@wehi.edu.au](mailto:patel.o@wehi.edu.au)

Lead contact: [lucet.i@wehi.edu.au](mailto:lucet.i@wehi.edu.au)

Keywords: DoubleCortin Like Kinase 1, Microtubule Associated Protein, Scaffolds, Cell signalling, Cancer, kinase inhibitors

Running title: Structural basis for DCLK1-IN-1 inhibition

Table S1. Data collection and refinement statistics

|                                             | DCLK1-IN-1             | XMD-8-85               | FMF-03-055-1         |
|---------------------------------------------|------------------------|------------------------|----------------------|
| <b>Data collection</b>                      |                        |                        |                      |
| Temperature                                 | 100K                   | 100K                   | 100K                 |
| Space group                                 | C2                     | I2                     | P21                  |
| Cell dimensions                             |                        |                        |                      |
| <i>a</i> , <i>b</i> , <i>c</i> (Å)          | 143.95, 61.71, 65.31   | 66.18, 63.33, 152.49   | 65.92, 62.43, 72.08  |
| $\alpha$ , $\beta$ , $\gamma$ (°)           | 90.00, 103.04, 90.00   | 90.00, 100.47, 90.00   | 90.00, 96.07, 90.00  |
| Resolution (Å)                              | 44.29-3.00 (3.18-3.00) | 74.97-2.50 (2.60-2.50) | 71.7-3.1 (3.31-3.10) |
| <i>R</i> <sub>pim</sub> <sup>1</sup>        | 6.4 (31.6)             | 6.0 (34.5)             | 11.5 (44.4)          |
| <i>I</i> / $\sigma$ <sub>1</sub>            | 11.4 (3.6)             | 10.8 (2.9)             | 7.3 (2.6)            |
| Completeness (%)                            | 98.9 (93.0)            | 99.1 (99.7)            | 99.4 (99.8)          |
| Total N <sup>o</sup> . observations         | 76277 (11337)          | 101629 (11767)         | 50639 (9282)         |
| N <sup>o</sup> . unique observations        | 11200 (1669)           | 21500 (2436)           | 10702 (1926)         |
| Multiplicity                                | 6.8 (6.8)              | 4.7 (4.8)              | 4.7 (4.8)            |
| CC <sub>1/2</sub> (%)                       | 99.6 (81.9)            | 99.3 (70.2)            | 98 (70.9)            |
| <b>Refinement statistics</b>                |                        |                        |                      |
| <i>R</i> <sub>factor</sub> <sup>2</sup> (%) | 20.3                   | 19.4                   | 19.6                 |
| <i>R</i> <sub>free</sub> <sup>3</sup> (%)   | 25.9                   | 22.5                   | 25.1                 |
| No. atoms                                   |                        |                        |                      |
| • Protein                                   | 3935                   | 3919                   | 3943                 |
| • Ligand                                    | 96                     | 68                     | 70                   |
| • Water                                     | 4                      | 92                     | -                    |
| Ramachandran plot (%)                       |                        |                        |                      |
| • Most favoured                             | 97.5                   | 98.6                   | 97.4                 |
| • Allowed region                            | 2.5                    | 1.4                    | 2.4                  |
| B-factors (Å <sup>2</sup> )                 |                        |                        |                      |
| • Protein                                   | 56.6                   | 36.9                   | 37.8                 |
| • ligand                                    | 60.7                   | 36.9                   | 42.8                 |
| rmsd bonds (Å)                              | 0.007                  | 0.004                  | 0.658                |
| rmsd angles (°)                             | 0.967                  | 0.707                  | 0.006                |

<sup>1</sup>  $R_{p.i.m} = \sum_{hkl} [1/(N-1)]^{1/2} \sum_i |I_{hkl,i} - \langle I_{hkl} \rangle| / \sum_{hkl} \langle I_{hkl} \rangle$

<sup>2</sup>  $R_{factor} = (\sum ||F_o| - |F_c||) / (\sum |F_o|)$  - for all data except as indicated in footnote 3.

<sup>3</sup> 5% of data was used for the *R*<sub>free</sub> calculation

Values in parentheses refer to the highest resolution bin.

**Table S2. SPR binding of inhibitors to DCLK1 – summary of fitted values**

| Inhibitor     | Immobilised protein | Fitted values |                                         |                 |                 |                |     |
|---------------|---------------------|---------------|-----------------------------------------|-----------------|-----------------|----------------|-----|
|               |                     | $K_D$ (nM)    | $k_{on}$ (1/Ms)<br>(x 10 <sup>5</sup> ) | $k_{off}$ (1/s) | $t_{1/2}$ (sec) | $R_{max}$ (RU) | N = |
| DCLK1-IN-1    | DCLK1 FL1Δ D511N    | 53 ± 5        | 5.1 ± 0.3                               | 0.027 ± 0.001   | 26 ± 1          | 11 ± 1         | 4   |
| FMF-03-055-01 | DCLK1 FL1Δ D511N    | 13 ± 2        | 11 ± 4                                  | 0.014 ± 0.006   | 50 ± 20         | 10 ± 1         | 3   |
| XMD8-85       | DCLK1 FL1Δ D511N    | 8 ± 1         | 12.8 ± 0.5                              | 0.010 ± 0.001   | 67 ± 6          | 8 ± 1          | 3   |
| DCLK1-NEG     | DCLK1 FL1Δ D511N    | > 10000       |                                         |                 |                 |                | 3   |
| DCLK1-IN-1    | DCLK1 FL1Δ WT       | 83 ± 22       | 6 ± 2                                   | 0.04 ± 0.01     | 17 ± 4          | 6 ± 1          | 4   |
| FMF-03-055-01 | DCLK1 FL1Δ WT       | 12 ± 2        | 9.6 ± 0.6                               | 0.011 ± 0.001   | 60 ± 1          | 4 ± 1          | 3   |
| XMD8-85       | DCLK1 FL1Δ WT       | 7.5 ± 0.3     | 22 ± 2                                  | 0.016 ± 0.001   | 44 ± 2          | 3 ± 1          | 3   |
| DCLK1-NEG     | DCLK1 FL1Δ WT       | > 10000       |                                         |                 |                 |                | 3   |

Errors are SEM, ND = not determined

$K_D$ , dissociation constant;  $k_{on}$ , on-rate;  $k_{off}$ , off-rate;  $t_{1/2}$ , dissociative half-life for the protein/inhibitor complex (calculated from the fitted dissociation rate constant ( $k_{off}$ ), according the equation  $t_{1/2} = \ln 2 / k_{off}$ ); N is the number of independent experiments.

**Figure S1**

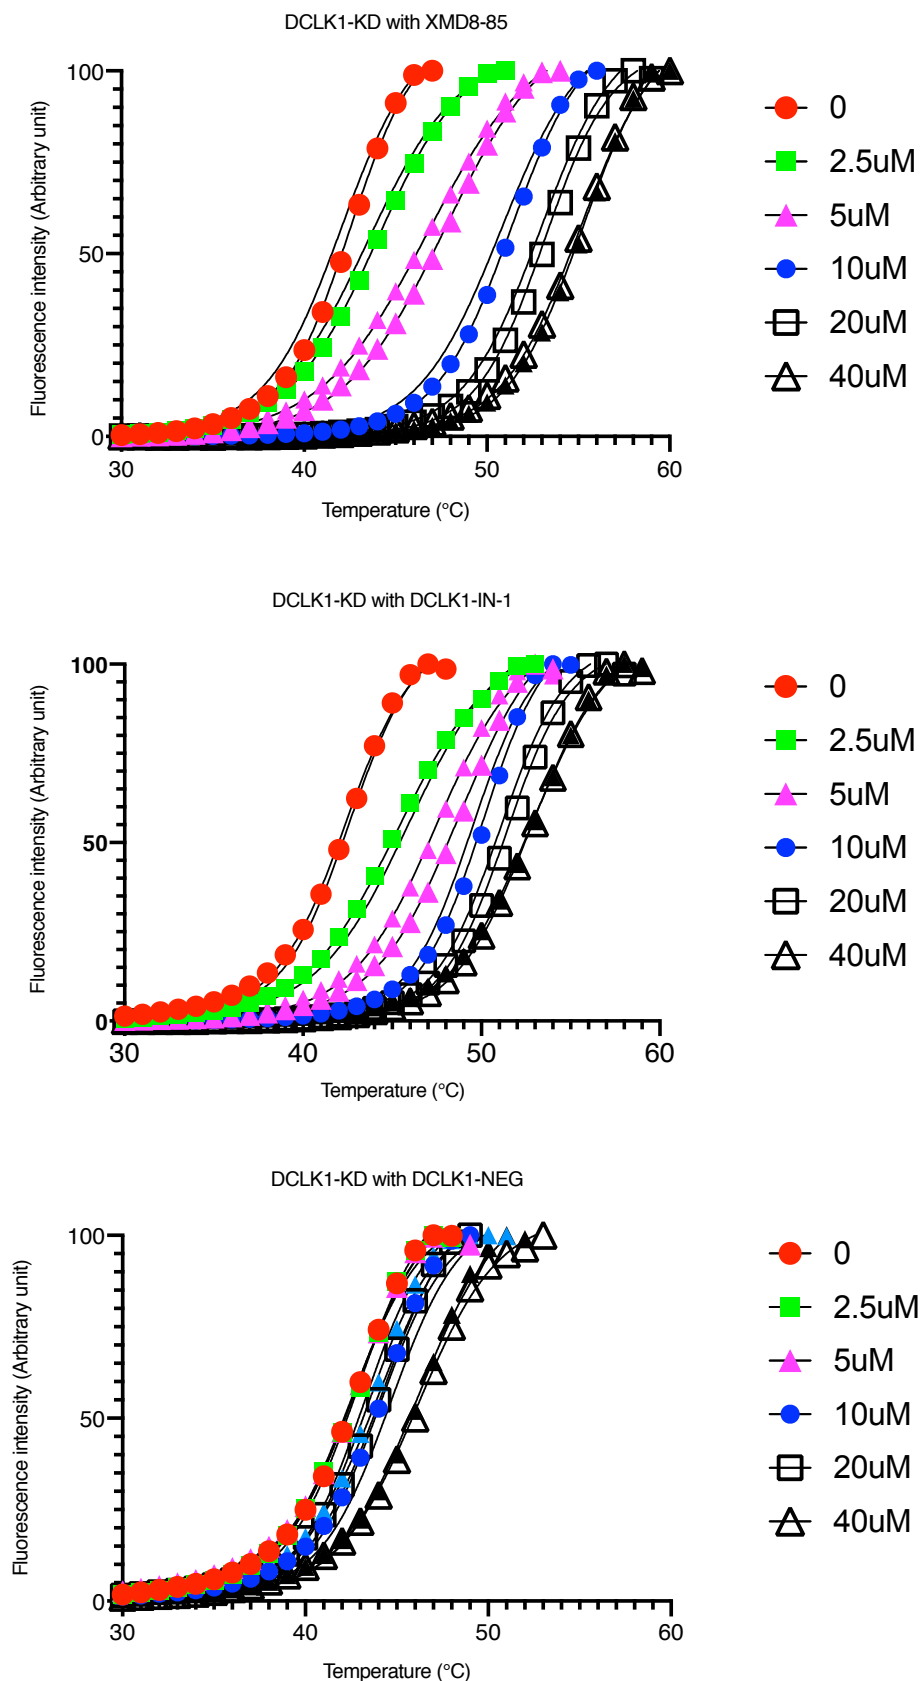

Figure S1. Thermal shift assay comparing melting profile of XMD8-85, DCLK1-IN-1 and DCLK1-NEG when bound to DCLK1-KD. Inhibitor concentration tested is as shown.

XMD8-85

FMF-03-055-1

DCLK1-IN-1

Figure S2. (A) Unbiased  $F_o - F_c$  density map contoured at  $3\sigma$  (left) and  $2F_o - F_c$  map contoured at  $1\sigma$  (right) for XMD8-85, FMF-03-055-1 and DCLK1-IN-1 bound to DCLK1.

**Figure S3**

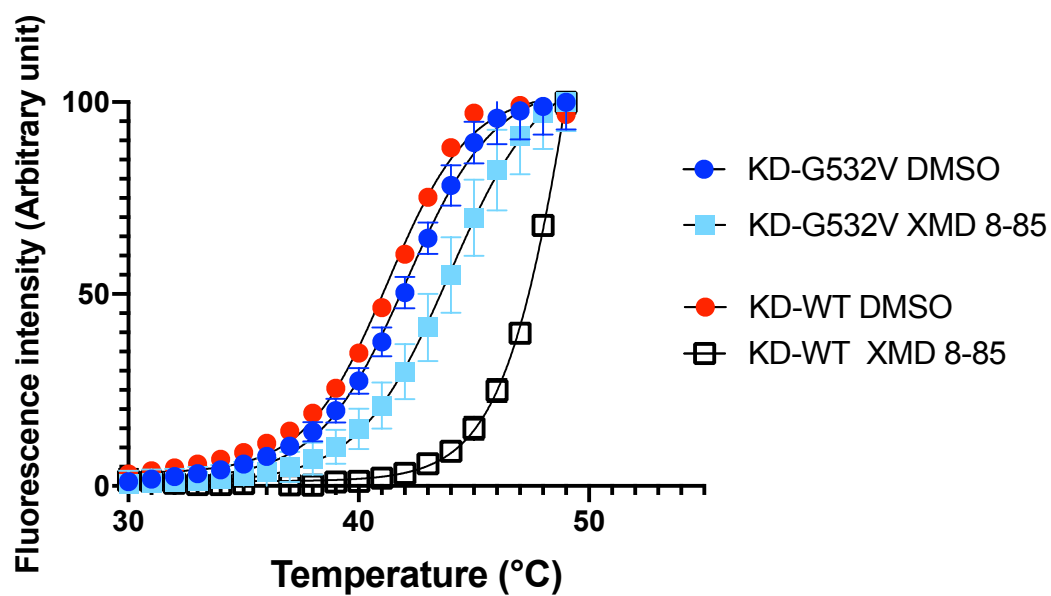

Figure S3. Thermal shift assay comparing melting profile of DCLK1-KD WT and DCLK1-KD G532V with XMD8-85.

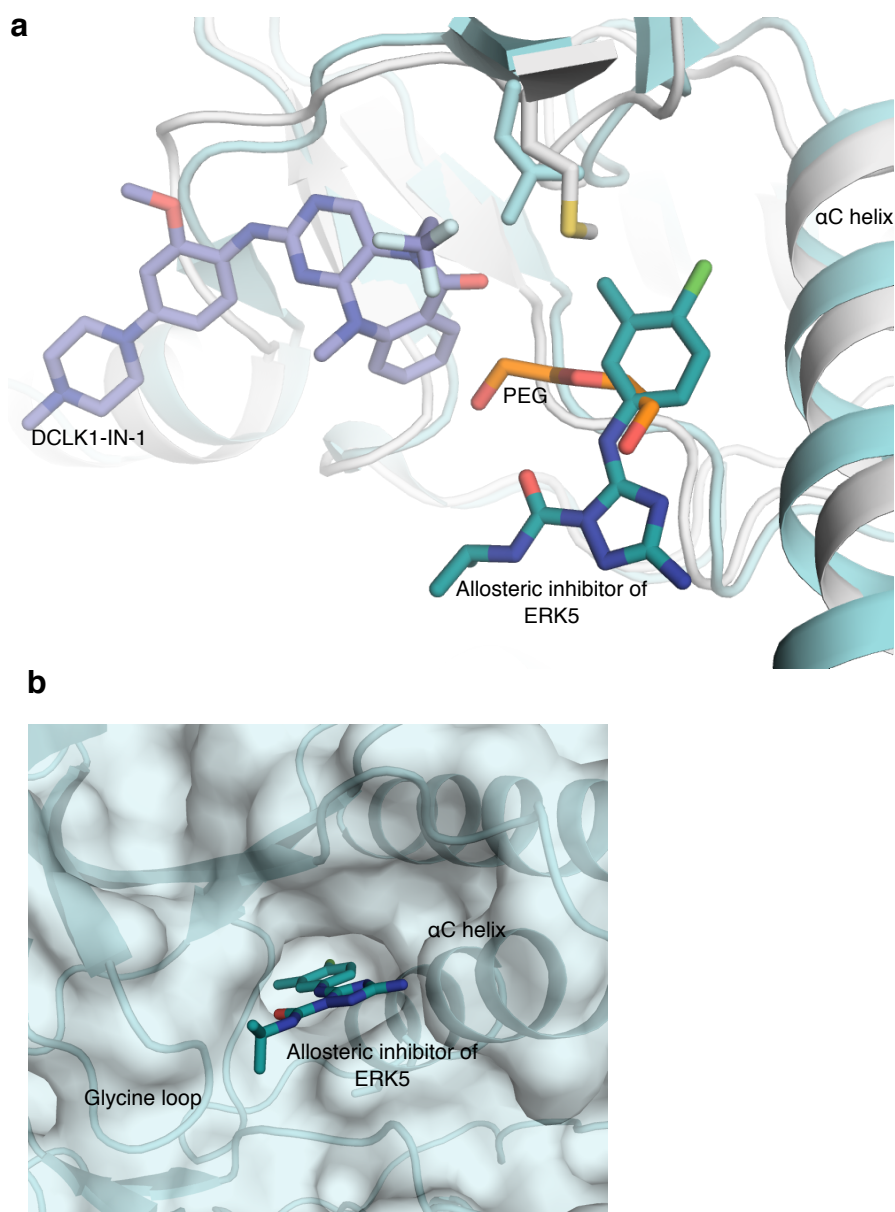

Figure S4. **a** Overlay of DCLK1-KD:DCLK1-IN-1 with ERK5 structure bound to an allosteric inhibitor (PDB 4ZSJ). The position of the PEG molecule in DCLK1-KD:DCLK1-IN-1 aligns with the position of the allosteric inhibitor in ERK5. **b** The crystal structure of ERK5 with an allosteric inhibitor (PDB 4ZSJ) showing the allosteric pocket stabilised in between the glycine loop and the  $\alpha$ C helix.

**Figure S5**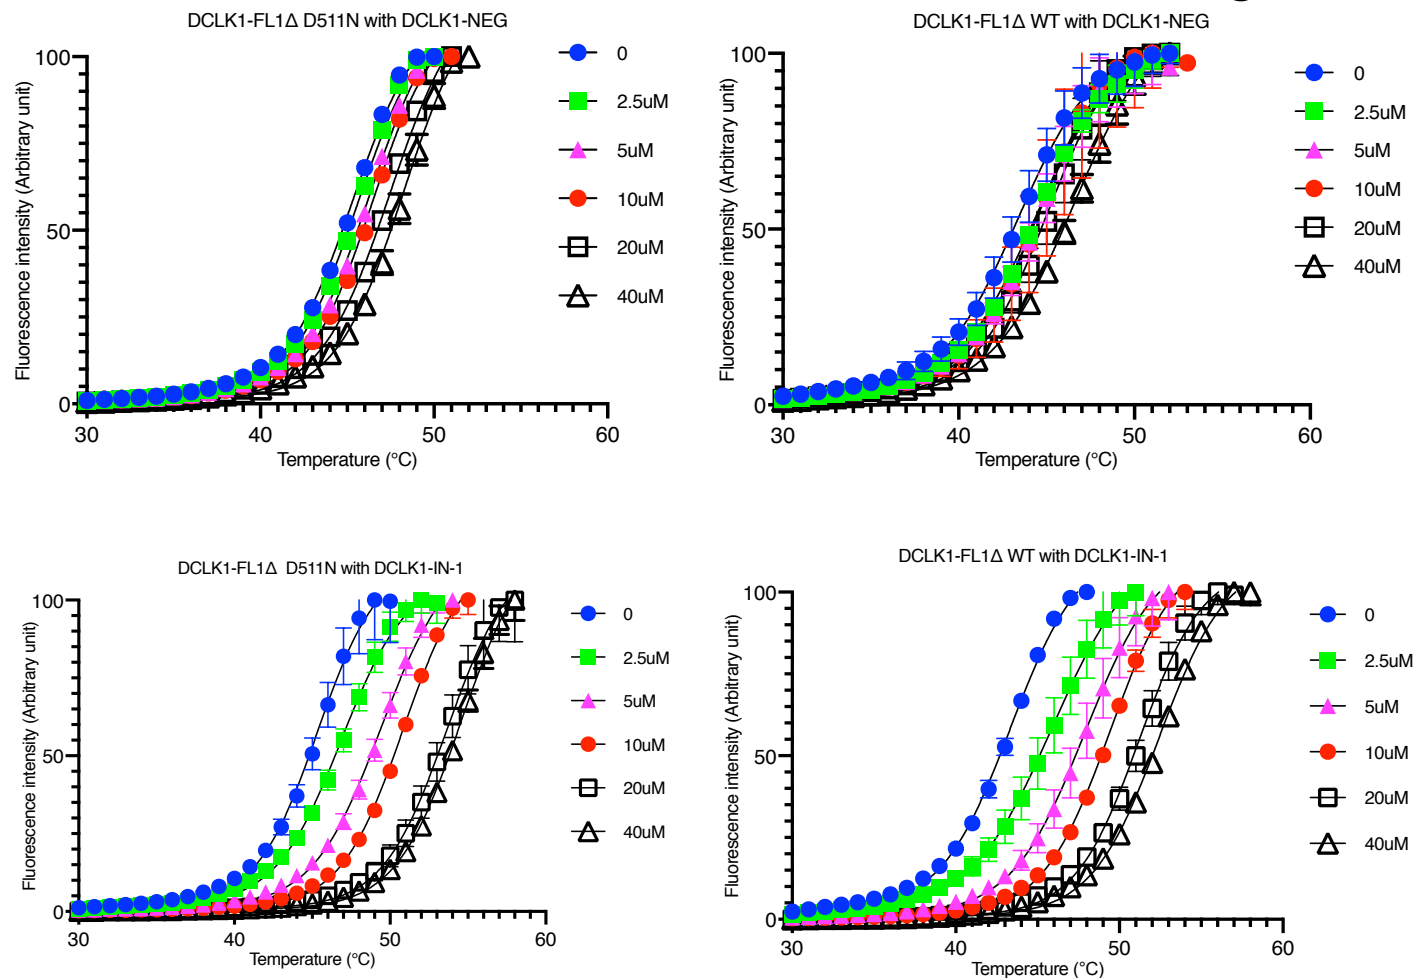

Figure S5. Thermal shift assay comparing melting profile of DCLK1-IN-1 and DCLK1-NEG with DCLK1-FL1Δ WT and DCLK1-FL1Δ D511N. Inhibitor concentration tested is as shown.



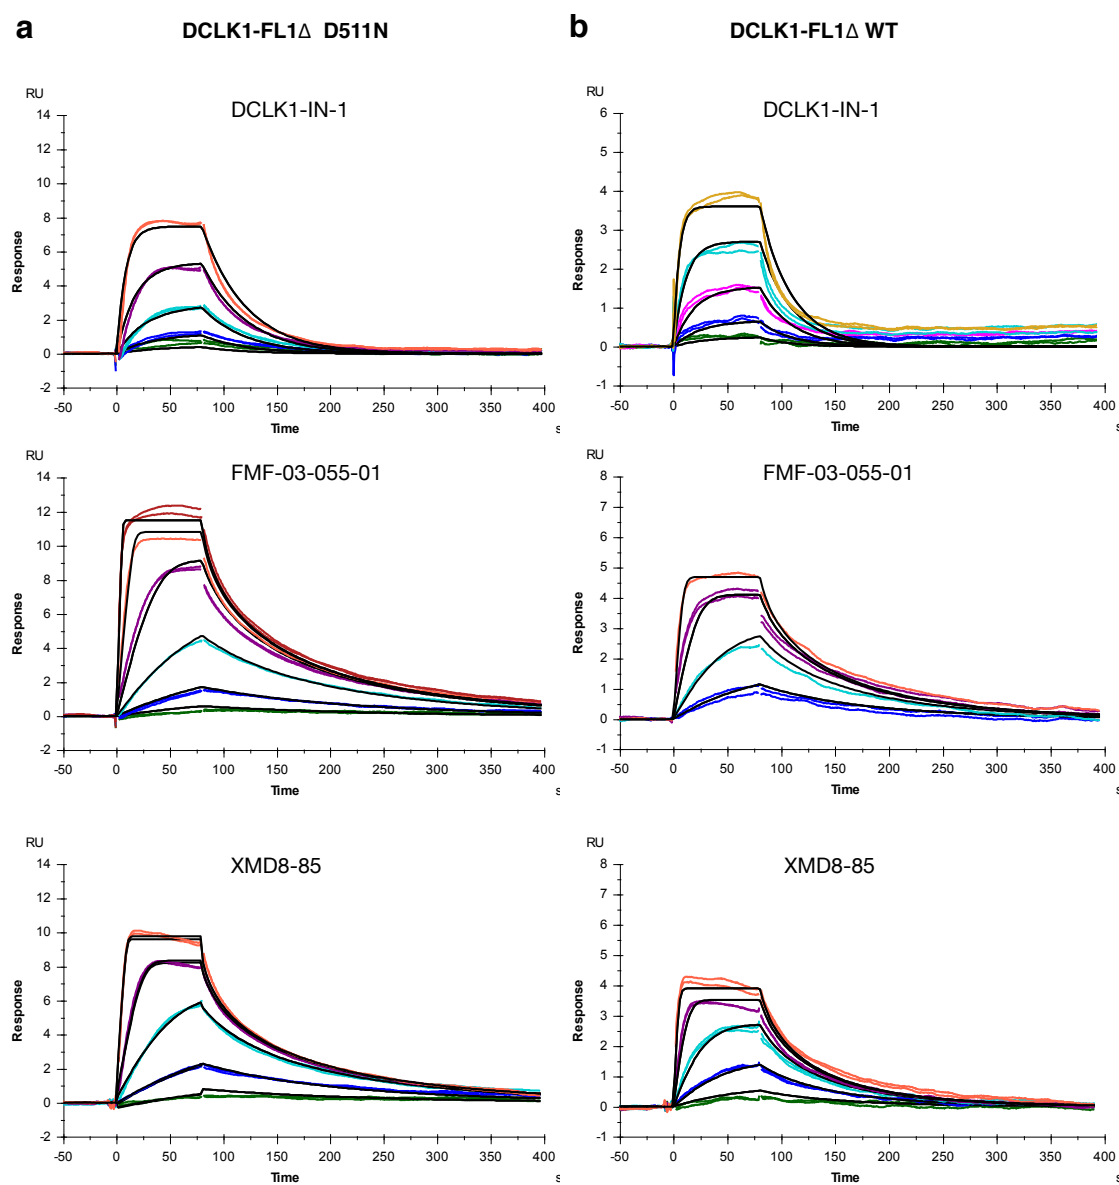

Figure S6. SPR kinetic fitting. Representative fitted SPR sensorgrams for DCLK1-IN-1, FMF-03-055-1 or XMD8-85 binding to immobilised DCLK1 FL1Δ D511N (a) or DCLK1 FL1Δ WT (b). Black lines represent kinetic fitting using a 1:1 binding model. Data represents an average of either four (DCLK1-IN-1) or three (FMF-03-0550-1 and XMD8-85) independent experiments. Mean fitted values are listed in Table S2.

**Figure S7**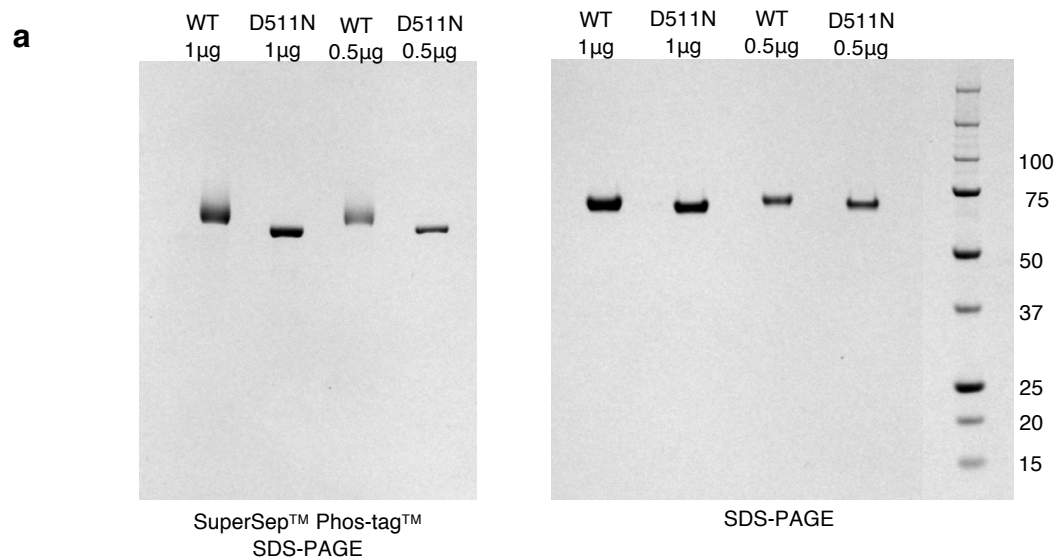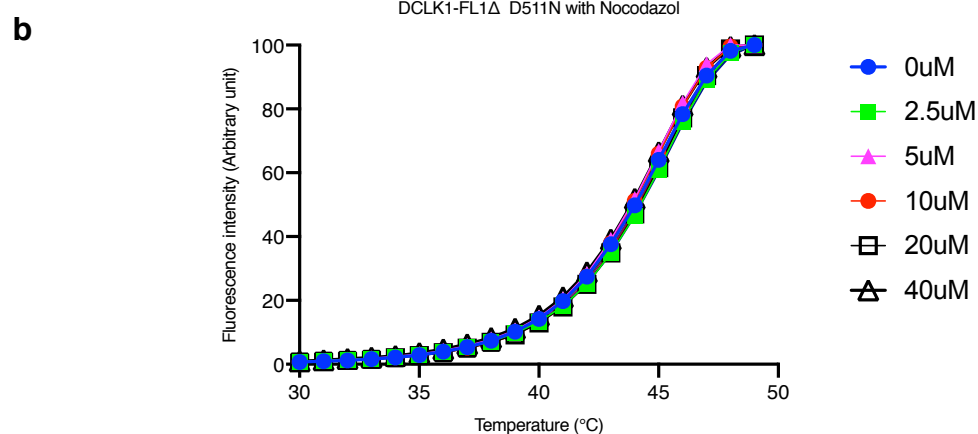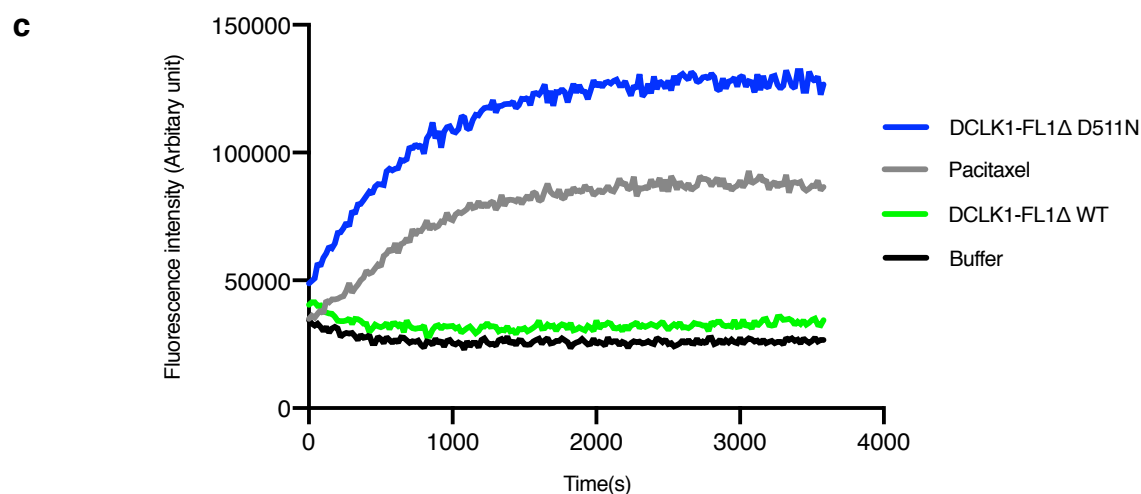

Figure S7. **a**. SuperSep™ Phos-tag™ 12.5% SDS-PAGE gel (left) and SDS-PAGE analysis (right) of DCLK1-FLA WT and DCLK1- FLA D511N. 1 µg and 0.5 µg samples were loaded on the gel. SDS-PAGE gel with molecular weight markers was run in parallel to make sure the proteins for the phos-tag analysis were not degraded. **b** Thermal shift assay to show that DCLK1- FLA D511N does not bind tubulin destabilisation drug, nocodazole (40 µM). This curve is a representation of samples tested in duplicates. **c** Tubulin polymerisation assay. Tubulin was incubated alone (control buffer), with paclitaxel (3 µM), or with DCLK1-FLA WT (4 µM) and DCLK1- FLA D511N (4 µM). This curve is a representation of samples tested in duplicates and in two independent experiments.
